# Supplementary material for: Similar acute physiological responses from effort and duration matched leg press and recumbent cycling tasks
Source: PeerJ. 2018 Feb 28;6:e4403. doi: 10.7717/peerj.4403 (PMC5834933; doi:10.7717/peerj.4403)
Supplement: Supplemental Information 3 [file peerj-06-4403-s003.xlsx]

## Sheet: Sheet1
	RT			RT			RT			RT						AE
	Set 1			Set 2			Set 3			Set 4			Avg			Set 1			Set 2			Set 3			Set 4			Avg
Participant	Mean	Peak	iEMG	Mean	Peak	iEMG	Mean	Peak	iEMG	Mean	Peak	iEMG	Mean	Peak	iEMG	Mean	Peak	iEMG	Mean	Peak	iEMG	Mean	Peak	iEMG	Mean	Peak	iEMG	Mean	Peak	iEMG
AB	30.3306	166.504	1786.38	28.8054	81.5169	2246.82	34.2269	89.1618	1950.74	34.0855	83.2502	2180.91	31.8621	105.108	2041.21	34.7301	125.857	2082.65	30.9012	112.406	1852.47	27.1086	89.9398	1626.2	26.505	89.0047	1588.75	29.8112	104.302	1787.52
DL	48.2998	154.608	3386.98	50.6091	128.364	2815.65	49.5307	174.727	3987.04	58.2466	164.947	4176.84	51.6716	155.662	3591.63	28.3324	182.93	1706.33	22.5364	158.296	1392.62	19.1497	296.196	1209.2	24.2537	129.665	1687.57	23.568	191.772	1498.93
DP	35.0464	86.0937	1807.77	38.467	88.7716	1979.55	33.4035	98.1549	3306.4	45.278	103.201	3094.54	38.0487	94.0554	2547.06	34.1716	164.165	1749.22	36.4829	128.256	2170.45	29.8543	101.717	1729.54	31.2405	114.205	1889.78	32.9373	127.086	1884.75
GM	44.4121	139.214	2282.32	42.6781	154.299	2206.68	54.3983	204.212	3673.73	76.704	1165.43	4132.73	54.5481	415.788	3073.86	30.8405	110.595	1919.42	35.9581	250.543	2255.51	30.8033	160.222	2059.07	28.3077	173.671	1749.36	31.4774	173.758	1995.84
JD	219.149	541.333	12478.6	227.206	564.087	13235.5	223.382	454.913	13873.1	243.248	519.86	15141	228.246	520.048	13682.1	154.863	612.566	9638.51	173.366	653.183	11125.9	160.492	631.887	9389.55	165.998	876.895	10133.8	163.68	693.633	10071.9
JW	51.3084	149.487	3294.66	49.7076	163.716	2857.69	53.4423	179.454	3339.57	65.1319	158.468	3140.88	54.8975	162.781	3158.2	60.9157	249.742	3889.92	57.7063	419.573	3458.34	56.85	224.119	3322.14	52.7748	310.312	3103.42	57.0617	300.936	3443.46
NL	100.824	837.348	4723.67	95.9943	307.269	3074.1	102.953	291.836	4938.23	113.055	349.84	3965.68	103.207	446.573	4175.42	38.9251	153.121	2305.8	31.258	119.042	1933.45	25.2025	91.574	1520.2	27.3026	384.728	1675.34	30.6721	187.116	1858.7
PL	73.1732	245.49	4383.08	88.086	220.988	4785.2	88.6215	236.243	4974.74	12.5757	45.3558	691.408	65.6141	187.019	3708.61	149.306	823.364	8917.31	91.4646	243.868	5527.11	72.9795	240.236	4250.68				104.583	435.823	6231.7
